# Supplementary material for: Identification of Selective BRD9 Inhibitor via Integrated Computational Approach
Source: MDPI journal article supplement (doi:10.3390/ijms232113513), 2022-11-04
Supplement: s1 [file s1]

**Figure S3. List of BRD4 active compounds with IC<sub>50</sub> (nM values)**

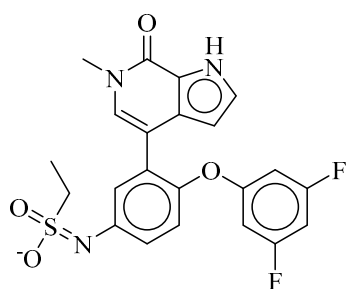

**1 (NA)**

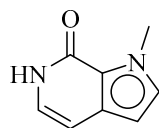

**2 (1x10<sup>5</sup> nM)**

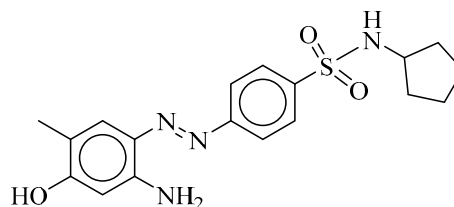

**3 (49 nM)**

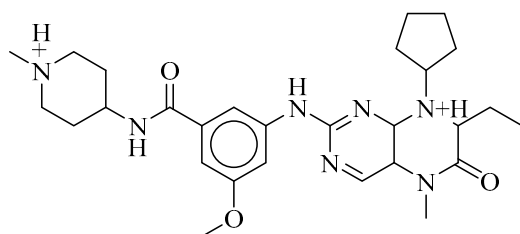

**4 (51 nM)**

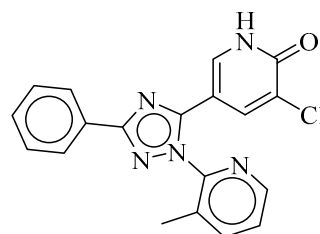

**5 (47x10<sup>2</sup> nM)**

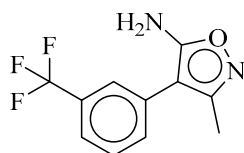

**6 (81x10<sup>3</sup> nM)**

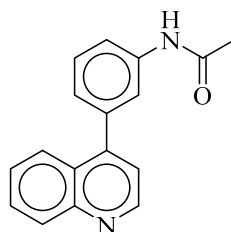

**7 (25x10<sup>4</sup> nM)**

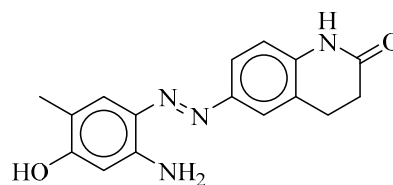

**8 (27 nM)**

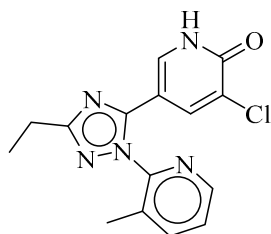

**9 (1x10<sup>5</sup> nM)**

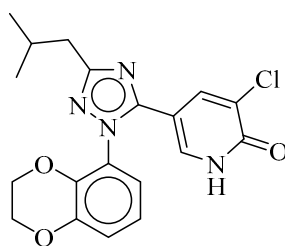

**10 (77x10<sup>3</sup> nM)**

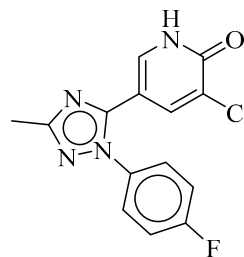

**11 (1x10<sup>5</sup> nM)**

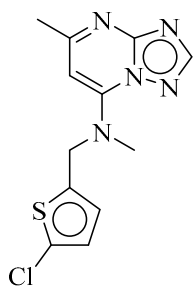

**12** ( $24 \times 10^3$  nM)

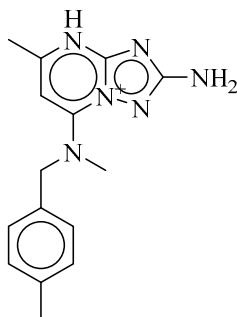

**13** ( $66 \times 10^3$  nM)

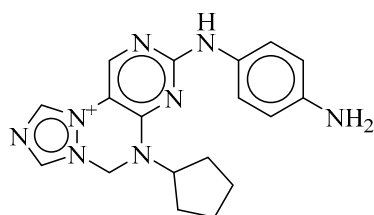

**14** (79 nM)

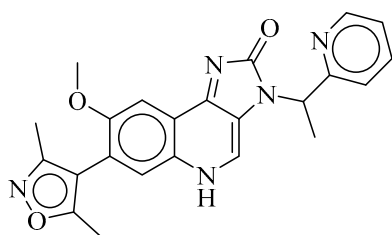

**15** ( $79 \times 10^1$  nM)

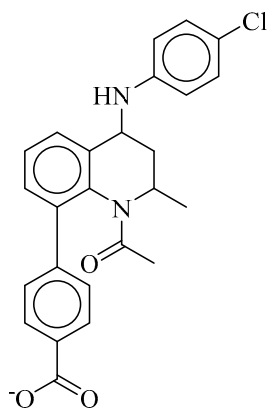

**16** (42 nM)

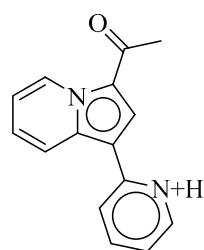

**17** ( $2 \times 10^3$  nM)

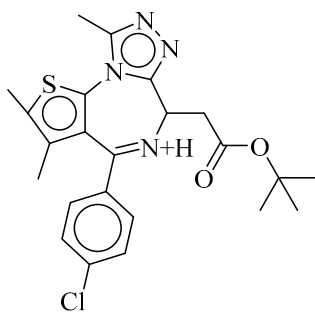

**18** (66 nM)

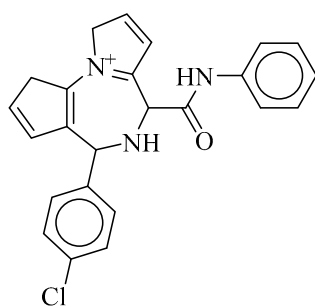

**19** (112 nM)

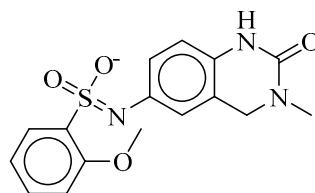

**20** (220 nM)

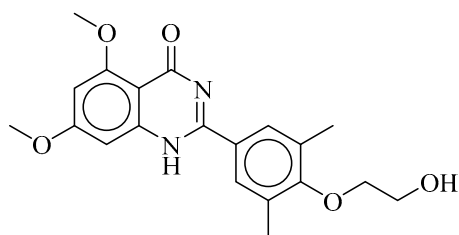

**21** ( $87 \times 10^3$  nM)

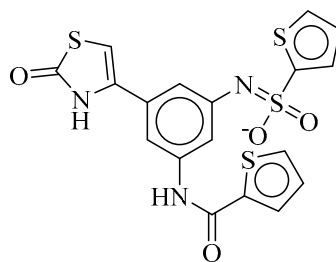

**22** (230 nM)

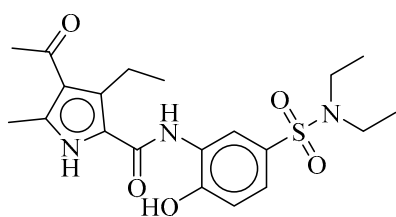

**23** ( $17 \times 10^3$  nM)

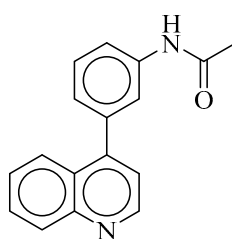

**24** ( $25 \times 10^4$  nM)

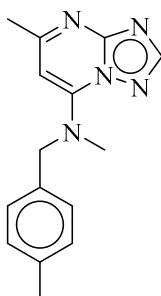

**25** ( $25 \times 10^4$  nM)
